# Supplementary material
Source: ML conference proceedings conference paper supplement (https://proceedings.mlr.press/v115/jiang20a.html)
Supplement: Supplementary file [file jiang20a-supp.pdf]

# Appendix

## A Empirical Estimates

**Lemma 1.** As  $|\mathcal{D}| \rightarrow \infty$ , if  $\mathcal{W}_1(p_{\bar{S}}, p_{S_a}) < \infty$  for all  $\mathbf{a}$ , the empirical barycenter satisfies  $\lim \sum_{\mathbf{a}} \hat{p}_{\mathbf{a}} \mathcal{W}_1(\hat{p}_{\bar{S}}, \hat{p}_{S_a}) \rightarrow \sum_{\mathbf{a}} p_{\mathbf{a}} \mathcal{W}_1(p_{\bar{S}}, p_{S_a})$  almost surely<sup>7</sup>.

*Proof.* By triangle inequality:

$$\sum_{\mathbf{a}} \hat{p}_{\mathbf{a}} \mathcal{W}_1(\hat{p}_{\bar{S}}, p_{S_a}) \leq \sum_{\mathbf{a}} \hat{p}_{\mathbf{a}} \mathcal{W}_1(\hat{p}_{\bar{S}}, \hat{p}_{S_a}) + \hat{p}_{\mathbf{a}} \mathcal{W}_1(p_{S_a}, \hat{p}_{S_a}), \quad (4)$$

$$\sum_{\mathbf{a}} p_{\mathbf{a}} \mathcal{W}_1(p_{\bar{S}}, \hat{p}_{S_a}) \leq \sum_{\mathbf{a}} p_{\mathbf{a}} \mathcal{W}_1(p_{\bar{S}}, p_{S_a}) + p_{\mathbf{a}} \mathcal{W}_1(p_{S_a}, \hat{p}_{S_a}). \quad (5)$$

Since  $p_{\bar{S}}$  and  $\hat{p}_{\bar{S}}$  are the weighted barycenters of  $\{p_{S_a}\}$  and  $\{\hat{p}_{S_a}\}$  respectively:

$$\sum_{\mathbf{a}} p_{\mathbf{a}} \mathcal{W}_1(p_{\bar{S}}, p_{S_a}) \leq \sum_{\mathbf{a}} p_{\mathbf{a}} \mathcal{W}_1(\hat{p}_{\bar{S}}, p_{S_a}), \quad (6)$$

$$\sum_{\mathbf{a}} \hat{p}_{\mathbf{a}} \mathcal{W}_1(\hat{p}_{\bar{S}}, \hat{p}_{S_a}) \leq \sum_{\mathbf{a}} \hat{p}_{\mathbf{a}} \mathcal{W}_1(p_{\bar{S}}, \hat{p}_{S_a}). \quad (7)$$

Combining Eqs. (4) and (6), and (5) and (7):

$$\begin{aligned} \sum_{\mathbf{a}} p_{\mathbf{a}} \mathcal{W}_1(p_{\bar{S}}, p_{S_a}) &\leq \sum_{\mathbf{a}} p_{\mathbf{a}} \mathcal{W}_1(\hat{p}_{\bar{S}}, \hat{p}_{S_a}) + p_{\mathbf{a}} \mathcal{W}_1(p_{S_a}, \hat{p}_{S_a}) \\ &\leq \sum_{\mathbf{a}} \hat{p}_{\mathbf{a}} \mathcal{W}_1(\hat{p}_{\bar{S}}, \hat{p}_{S_a}) + |\hat{p}_{\mathbf{a}} \mathcal{W}_1(\hat{p}_{\bar{S}}, \hat{p}_{S_a}) - p_{\mathbf{a}} \mathcal{W}_1(\hat{p}_{\bar{S}}, \hat{p}_{S_a})| + p_{\mathbf{a}} \mathcal{W}_1(p_{S_a}, \hat{p}_{S_a}) \\ &\leq \sum_{\mathbf{a}} \hat{p}_{\mathbf{a}} \mathcal{W}_1(\hat{p}_{\bar{S}}, \hat{p}_{S_a}) + |\hat{p}_{\mathbf{a}} - p_{\mathbf{a}}| \cdot |\mathcal{W}_1(\hat{p}_{\bar{S}}, \hat{p}_{S_a})| + p_{\mathbf{a}} \mathcal{W}_1(p_{S_a}, \hat{p}_{S_a}) \\ \sum_{\mathbf{a}} \hat{p}_{\mathbf{a}} \mathcal{W}_1(\hat{p}_{\bar{S}}, \hat{p}_{S_a}) &\leq \sum_{\mathbf{a}} \hat{p}_{\mathbf{a}} \mathcal{W}_1(p_{\bar{S}}, p_{S_a}) + \hat{p}_{\mathbf{a}} \mathcal{W}_1(p_{S_a}, \hat{p}_{S_a}) \\ &\leq \sum_{\mathbf{a}} p_{\mathbf{a}} \mathcal{W}_1(p_{\bar{S}}, p_{S_a}) + |p_{\mathbf{a}} \mathcal{W}_1(p_{\bar{S}}, p_{S_a}) - \hat{p}_{\mathbf{a}} \mathcal{W}_1(p_{\bar{S}}, p_{S_a})| + \hat{p}_{\mathbf{a}} \mathcal{W}_1(p_{S_a}, \hat{p}_{S_a}) \\ &\leq \sum_{\mathbf{a}} p_{\mathbf{a}} \mathcal{W}_1(p_{\bar{S}}, p_{S_a}) + |p_{\mathbf{a}} - \hat{p}_{\mathbf{a}}| \cdot |\mathcal{W}_1(p_{\bar{S}}, p_{S_a})| + \hat{p}_{\mathbf{a}} \mathcal{W}_1(p_{S_a}, \hat{p}_{S_a}). \end{aligned}$$

Therefore the following inequality holds almost surely:

$$\begin{aligned} \left| \sum_{\mathbf{a}} p_{\mathbf{a}} \mathcal{W}_1(p_{\bar{S}}, p_{S_a}) - \sum_{\mathbf{a}} \hat{p}_{\mathbf{a}} \mathcal{W}_1(\hat{p}_{\bar{S}}, \hat{p}_{S_a}) \right| &\leq \sum_{\mathbf{a}} \hat{p}_{\mathbf{a}} \mathcal{W}_1(p_{S_a}, \hat{p}_{S_a}) + |p_{\mathbf{a}} - \hat{p}_{\mathbf{a}}| \cdot \mathcal{W}_1(p_{\bar{S}}, p_{S_a}) \\ &\leq \sum_{\mathbf{a}} \mathcal{W}_1(p_{S_a}, \hat{p}_{S_a}) + |p_{\mathbf{a}} - \hat{p}_{\mathbf{a}}| \cdot \mathcal{W}_1(p_{\bar{S}}, p_{S_a}) \\ &\leq \sum_{\mathbf{a}} \mathcal{W}_1(p_{S_a}, \hat{p}_{S_a}) + |p_{\mathbf{a}} - \hat{p}_{\mathbf{a}}| \cdot \mathcal{W}_1(p_{\bar{S}}, p_{S_a}). \end{aligned}$$

Since  $\mathcal{W}_1(p_{S_a}, \hat{p}_{S_a}) \rightarrow 0$  almost surely for all  $\mathbf{a}$  (see Weed and Bach (2017)), and  $\hat{p}_{\mathbf{a}} \rightarrow p_{\mathbf{a}}$  almost surely (by the strong law of large numbers) and  $\mathcal{W}_1(p_{\bar{S}}, p_{S_a}) < \infty$  for all  $\mathbf{a}$ , the result follows:

$$\lim \sum_{\mathbf{a}} \hat{p}_{\mathbf{a}} \mathcal{W}_1(\hat{p}_{\bar{S}}, \hat{p}_{S_a}) \rightarrow \sum_{\mathbf{a}} p_{\mathbf{a}} \mathcal{W}_1(p_{\bar{S}}, p_{S_a}),$$

almost surely. □

<sup>7</sup>See Klenke (2013) for a formal definition of almost sure convergence of random variables.

## B Generalization

The following lemma addresses generalization of the Wasserstein-1 objective. Assume  $\mathcal{W}_1(p_{S_a}, p_{\bar{S}}) \leq L$  for all  $\mathbf{a} \in \mathcal{A}$ . Let  $P_S, P_{S_a}$  and  $P_{\bar{S}}$  be the cumulative density functions of  $S, S_a$  and  $\bar{S}$ . Assume these random variables all have domain  $\Omega = [0, 1]$  and that all  $P \in \{P_S, P_{\bar{S}}\} \cup \{P_{S_a}\}_{\mathbf{a} \in \mathcal{A}}$  are continuous, then:

**Lemma 5.** For any  $\epsilon, \delta > 0$ , if  $\min[\bar{N}, \min_{\mathbf{a}} [N_{\mathbf{a}}]] \geq \frac{16 \log(2|\mathcal{A}|/\delta)|\mathcal{A}|^2 \max[1, L]^2}{\epsilon^2}$ , with probability  $1 - \delta$ :

$$\sum_{\mathbf{a} \in \mathcal{A}} p_{\mathbf{a}} \mathcal{W}_1(p_{S_a}, p_{\bar{S}}) \leq \sum_{\mathbf{a} \in \mathcal{A}} \hat{p}_{\mathbf{a}} \mathcal{W}_1(\hat{p}_{S_a}, \hat{p}_{\bar{S}}) + \epsilon.$$

In other words, provided access to sufficient samples, a low value of  $\sum_{\mathbf{a}} \hat{p}_{\mathbf{a}} \mathcal{W}_1(\hat{p}_{S_a}, \hat{p}_{\bar{S}})$  implies a low value for  $\sum_{\mathbf{a}} p_{\mathbf{a}} \mathcal{W}_1(p_{S_a}, p_{\bar{S}})$  with high probability and therefore good performance at test time.

*Proof.* We start with the case when  $p_{\bar{S}} = p_S$ . By the triangle inequality for Wasserstein-1 distances, for all  $\mathbf{a} \in \mathcal{A}$ :

$$\hat{p}_{\mathbf{a}} \mathcal{W}_1(p_{S_a}, p_{\bar{S}}) \leq \hat{p}_{\mathbf{a}} \mathcal{W}_1(\hat{p}_{S_a}, \hat{p}_{\bar{S}}) + \hat{p}_{\mathbf{a}} \mathcal{W}_1(\hat{p}_{\bar{S}}, p_{\bar{S}}) + \hat{p}_{\mathbf{a}} \mathcal{W}_1(\hat{p}_{S_a}, p_{S_a}). \quad (8)$$

Let  $\hat{P}$  for  $P \in \{P_S, P_{\bar{S}}\} \cup \{P_{S_a}\}_{\mathbf{a} \in \mathcal{A}}$  denote the empirical CDF of  $P$ . Since their domain is restricted to  $[0, 1]$  and are one dimensional random variables:

$$\mathcal{W}_1(\hat{p}_{S_*}, p_{S_*}) = \int_0^1 |\hat{P}(x) - P(x)| dx \quad (9)$$

For  $S_* \in \{S, \bar{S}\} \cup \{S_a\}_{\mathbf{a} \in \mathcal{A}}$ . Since  $P \in \{P_S, P_{\bar{S}}\} \cup \{P_{S_a}\}_{\mathbf{a} \in \mathcal{A}}$  are all continuous, the Dvoretzky-Kiefer-Wolfowitz theorem (see main theorem in Massart (1990)) and the condition  $\min[\bar{N}, \min_{\mathbf{a}} [N_{\mathbf{a}}]] \geq \frac{16 \log(2|\mathcal{A}|/\delta)|\mathcal{A}|^2 \max[1, L]^2}{\epsilon^2}$  implies that:

$$\mathbb{P} \left( \sup_{x \in [0, 1]} |\hat{P}(x) - P(x)| \geq \frac{\epsilon}{4} \right) \leq \frac{\delta}{2|\mathcal{A}|}$$

Since all the random variables have domain  $[0, 1]$  this in turn implies that for all  $S_* \in \{S, \bar{S}\} \cup \{S_a\}_{\mathbf{a} \in \mathcal{A}}$ :

$$\mathbb{P} \left( \mathcal{W}_1(\hat{p}_{S_*}, p_{S_*}) \geq \frac{\epsilon}{4} \right) \leq \frac{\delta}{2|\mathcal{A}|}$$

And therefore that with probability  $\geq 1 - \frac{\delta}{2}$  the following inequalities hold simultaneously for all  $\mathbf{a} \in \mathcal{A}$ :

$$\hat{p}_{\mathbf{a}} \mathcal{W}_1(\hat{p}_{\bar{S}}, p_{\bar{S}}) \leq \frac{\hat{p}_{\mathbf{a}} \epsilon}{4}, \quad \hat{p}_{\mathbf{a}} \mathcal{W}_1(\hat{p}_{S_a}, p_{S_a}) \leq \frac{\hat{p}_{\mathbf{a}} \epsilon}{4}. \quad (10)$$

Summing Eq. (8) over  $\mathbf{a}$  and applying the last observation yields

$$\sum_{\mathbf{a} \in \mathcal{A}} \hat{p}_{\mathbf{a}} \mathcal{W}_1(p_{S_a}, p_{\bar{S}}) \leq \sum_{\mathbf{a} \in \mathcal{A}} \hat{p}_{\mathbf{a}} \mathcal{W}_1(\hat{p}_{S_a}, \hat{p}_{\bar{S}}) + \frac{\epsilon}{2}.$$

Recall that we assume  $\forall \mathbf{a} \in \mathcal{A}$ ,

$$\mathcal{W}_1(p_{S_a}, p_{\bar{S}}) \leq L.$$

By concentration of measure of Bernoulli random variables, with probability  $\geq 1 - \frac{\delta}{2}$  the following inequality holds simultaneously for all  $\mathbf{a} \in \mathcal{A}$ :

$$|p_{\mathbf{a}} - \hat{p}_{\mathbf{a}}| \leq \frac{\epsilon}{4|\mathcal{A}| \max[L, 1]}. \quad (11)$$

Consequently the desired result holds:

$$\sum_{\mathbf{a} \in \mathcal{A}} p_{\mathbf{a}} \mathcal{W}_1(p_{S_a}, p_{\bar{S}}) \leq \sum_{\mathbf{a} \in \mathcal{A}} \hat{p}_{\mathbf{a}} \mathcal{W}_1(\hat{p}_{S_a}, \hat{p}_{\bar{S}}) + \epsilon.$$

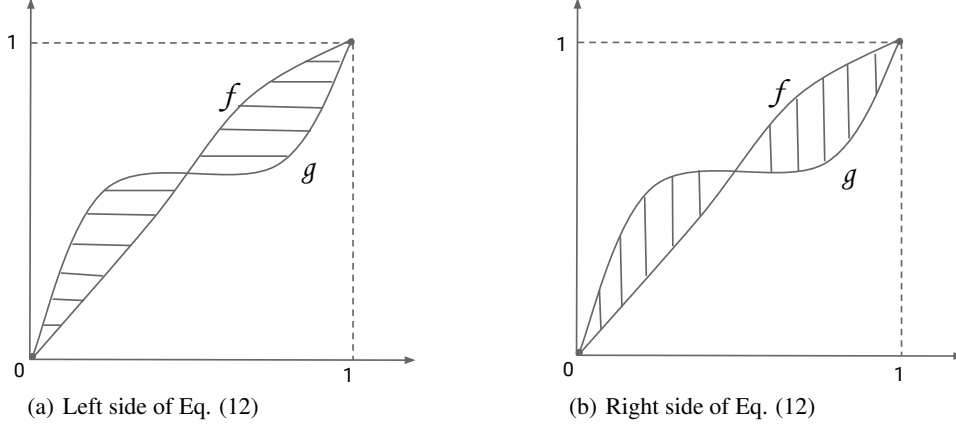

Figure 3: Integrating  $|f^{-1} - g^{-1}|$  along the  $x$  axis (left) and integrating  $|f - g|$  along the  $y$  axis (right) both compute the area of the same shaded region, thus the equality in Eq. (12).

If  $p_{\bar{s}}$  equals the weighted barycenter of the population level distributions  $\{p_{S_a}\}$ , then

$$\sum_{\alpha \in \mathcal{A}} p_{\alpha} \mathcal{W}_1(p_{S_a}, p_{\bar{s}}) \leq \sum_{\alpha \in \mathcal{A}} p_{\alpha} \mathcal{W}_1(p_{S_a}, \hat{p}_{\bar{s}}).$$

Since  $\hat{p}_{\alpha} \mathcal{W}_1(p_{S_a}, \hat{p}_{\bar{s}}) \leq \hat{p}_{\alpha} \mathcal{W}_1(\hat{p}_{S_a}, \hat{p}_{\bar{s}}) + \hat{p}_{\alpha} \mathcal{W}_1(\hat{p}_{S_a}, p_{S_a})$ , with probability  $1 - \delta$ :

$$\begin{aligned} \sum_{\alpha \in \mathcal{A}} p_{\alpha} \mathcal{W}_1(p_{S_a}, p_{\bar{s}}) &\leq \sum_{\alpha \in \mathcal{A}} \hat{p}_{\alpha} \mathcal{W}_1(p_{S_a}, p_{\bar{s}}) + \frac{\epsilon}{2} \\ &\leq \sum_{\alpha \in \mathcal{A}} \hat{p}_{\alpha} \mathcal{W}_1(\hat{p}_{S_a}, \hat{p}_{\bar{s}}) + \hat{p}_{\alpha} \mathcal{W}_1(\hat{p}_{S_a}, p_{S_a}) + \frac{\epsilon}{2} \\ &\leq \sum_{\alpha \in \mathcal{A}} \hat{p}_{\alpha} \mathcal{W}_1(\hat{p}_{S_a}, \hat{p}_{\bar{s}}) + \epsilon \end{aligned}$$

The first inequality follows from Eq. (11), and the third one by Eq. (10). The result follows.  $\square$

## C Inverse CDFs

**Lemma 6.** *Given two differentiable and invertible cumulative distribution functions  $f, g$  over the probability space  $\Omega = [0, 1]$ , thus  $f, g : [0, 1] \rightarrow [0, 1]$ , we have*

$$\int_{s=0}^1 |f^{-1}(s) - g^{-1}(s)| ds = \int_{\tau=0}^1 |f(\tau) - g(\tau)| d\tau. \quad (12)$$

Intuitively, we see that the left and right side of Eq. (12) correspond to two ways of computing the same shaded area in Figure 3. Here is a complete proof.

*Proof.* Invertible CDFs  $f, g$  are strictly increasing functions due to being bijective and non-decreasing. Furthermore, we have  $f(0) = 0, f(1) = 1$  by definition of CDFs and  $\Omega = [0, 1]$ , since  $P(X \leq 0) = 0, P(X \leq 1) = 1$  where  $X$  is the corresponding random variable. The same holds for the function  $g$ . Given an interval  $(x_1, x_2) \subset [0, 1]$ , let  $y_1 = f(x_1), y_2 = f(x_2)$ . Since  $f$  is differentiable, we have

$$\int_{x=x_1}^{x_2} f(x) dx + \int_{y=y_1}^{y_2} f^{-1}(y) dy = x_2 y_2 - x_1 y_1. \quad (13)$$

The proof of Eq. (13) is the following (see also Laisant (1905)).

$$\begin{aligned}
& f^{-1}(f(x)) = x \\
\implies & f'(x)f^{-1}(f(x)) = f'(x)x && \text{(multiply both sides by } f'(x)) \\
\implies & \int_{x=x_1}^{x_2} f'(x)f^{-1}(f(x))dx = \int_{x=x_1}^{x_2} f'(x)x dx && \text{(integrate both sides)} \\
\implies & \int_{y=y_1}^{y_2} f^{-1}(y)dy = \int_{x=x_1}^{x_2} f'(x)x dx && \text{(apply change of variable } y = f(x) \text{ on the left side)} \\
\implies & \int_{y=y_1}^{y_2} f^{-1}(y)dy = xf(x) \Big|_{x=x_1}^{x_2} - \int_{x=x_1}^{x_2} f(x)dx && \text{(integrate by parts on the right side)} \\
\implies & \int_{y=y_1}^{y_2} f^{-1}(y)dy + \int_{x=x_1}^{x_2} f(x)dx = x_2y_2 - x_1y_1.
\end{aligned}$$

Define a function  $h := f - g$  on  $[0, 1]$ . Then  $h$  is differentiable and thus continuous. Define the set of roots  $A := \{x \in [0, 1] \mid h(x) = 0\}$ . Define the set of open intervals on which either  $h > 0$  or  $h < 0$  by  $B := \{(a, b) \mid b = \inf\{s \in A \mid a < s\}, 0 \leq a < b \leq 1, a \in A\}$ . By continuity of  $h$ , for any  $(a, b) \in B$ , we have  $b \in A$ , i.e.  $b$  is also a root of  $h$ . Since there are no other roots of  $h$  in  $(a, b)$ , by continuity of  $h$ , we must have either  $h > 0$  or  $h < 0$  on  $(a, b)$ . For any two elements  $(a, b), (c, d) \in B$ , we argue that they must be disjoint intervals. Without loss of generality, we assume  $a < c$ . Since  $b = \inf\{s \in A \mid a < s\} \leq c$ , i.e.  $b \leq c$ , then  $(a, b) \cap (c, d) = \emptyset$ . For any open interval  $(a, b) \in B$ , there exists a rational number  $q \in \mathbb{Q}$  such that  $a < q < b$ . We pick such a rational number and call it  $q_{(a,b)}$ . Since all elements of  $B$  are disjoint, for any two intervals  $(a_0, b_0), (a_1, b_1)$  containing  $q_{(a_0,b_0)}, q_{(a_1,b_1)} \in \mathbb{Q}$  respectively, we must have  $q_{(a_0,b_0)} \neq q_{(a_1,b_1)}$ . We define the set  $Q_B := \{q_{(a,b)} \in \mathbb{Q} \mid (a, b) \in B\}$ . Then  $Q_B \subset \mathbb{Q}$  and  $|Q_B| = |B|$ . Since the set of rational numbers  $\mathbb{Q}$  is countable, the set  $B$  must also be countable. Let  $B = \{(a_i, b_i)\}_{i=0}^N$  where  $N \in \mathbb{N}$  or  $N = \infty$ . Recall that  $h = f - g$  on  $[0, 1]$ ,  $h(a_i) = 0, h(b_i) = 0$  and either  $h < 0$  or  $h > 0$  on  $(a_i, b_i)$  for  $\forall i > 0$ .

Consider the interval  $(a_i, b_i)$  for some  $i > 0$ , by Eq.13 we have

$$\begin{aligned}
& \int_{\tau=a_i}^{b_i} f(\tau)d\tau + \int_{s=f(a_i)}^{f(b_i)} f^{-1}(s)ds = b_i f(b_i) - a_i f(a_i) \\
& = b_i g(b_i) - a_i g(a_i) = \int_{\tau=a_i}^{b_i} g(\tau)d\tau + \int_{s=g(a_i)}^{g(b_i)} g^{-1}(s)ds.
\end{aligned}$$

Thus

$$\int_{\tau=a_i}^{b_i} f(\tau) - g(\tau)d\tau = \int_{s=f(a_i)}^{f(b_i)} g^{-1}(s) - f^{-1}(s)ds.$$

Notice that if  $f > g$  on  $[a_i, b_i]$ , then  $f^{-1} < g^{-1}$  on  $[f(a_i), f(b_i)]$ . This is due to the following. Given any  $y \in [f(a_i), f(b_i)] = [g(a_i), g(b_i)]$ , we have  $g^{-1}(y) \in [a_i, b_i]$  and  $f(g^{-1}(y)) > g(g^{-1}(y)) = y = f(f^{-1}(y))$ . Thus  $g^{-1} > f^{-1}$  since  $f$  is strictly increasing. The contrary holds by the same reasoning, i.e. if  $f < g$  on  $[a_i, b_i]$ , then  $f^{-1} > g^{-1}$  on  $[f(a_i), f(b_i)]$ . Therefore,

$$\int_{\tau=a_i}^{b_i} |f(\tau) - g(\tau)|d\tau = \int_{s=f(a_i)}^{f(b_i)} |g^{-1}(s) - f^{-1}(s)|ds,$$

which holds for all intervals  $(a_i, b_i)$ . Summing over  $i$  on both sides, we have

$$\sum_{i=0}^N \int_{\tau=a_i}^{b_i} |f(\tau) - g(\tau)|d\tau = \sum_{i=0}^N \int_{s=f(a_i)}^{f(b_i)} |g^{-1}(s) - f^{-1}(s)|ds,$$

or equivalently,

$$\int_{s=0}^1 |f^{-1}(s) - g^{-1}(s)|ds = \int_{\tau=0}^1 |f(\tau) - g(\tau)|d\tau.$$

□
